# Supplementary material for: Home range size and habitat selection of owned outdoor domestic cats (Felis catus) in urban southwestern Ontario
Source: PeerJ. 2024 Mar 29;12:e17159. doi: 10.7717/peerj.17159 (PMC10984174; doi:10.7717/peerj.17159)
Supplement: Supplemental Information 4 [file peerj-12-17159-s004.pdf]

Below each cat behaviour or personality characteristic there is a ranking scale ranging from "strongly disagree" **to** "strongly agree". Please rate your cat on whether they demonstrate each behaviour or personality characteristic. Since each personality characteristic might differ from your own personal definition of the word, please use the definition we have provided here.

**NOTE:** Please answer ALL of the questions, as failing to do so will result in an inability to assess your cat's personality.

This project has been reviewed by the Animal Care Committee of the University of Guelph for compliance with research involving animal participants (AUP #4189) and by the Research Ethics Board of the University of Guelph for compliance with federal guidelines for research involving human participants (REB # 19-06-005).

What is your cat's name?

What is the **ID code** given to you by the research team?

Please rate your cat on whether they demonstrate each behaviour or personality characteristic.

|                                                                                                                                                                  | Strongly Disagree     | Disagree              | Somewhat Disagree     | Neutral               | Somewhat Agree        | Agree                 | Strongly Agree        |
|------------------------------------------------------------------------------------------------------------------------------------------------------------------|-----------------------|-----------------------|-----------------------|-----------------------|-----------------------|-----------------------|-----------------------|
| Vigilant – Watchful, observant; spends a lot of time attending to his/her surroundings.                                                                          | <input type="radio"/> |
| Stable – Calmly reacts to his/her environment.                                                                                                                   | <input type="radio"/> |
| Bold – daring, not restrained or tentative, doesn't hesitate.                                                                                                    | <input type="radio"/> |
| Clumsy – relatively awkward or uncoordinated during movements, e.g. when walking, climbing, or playing.                                                          | <input type="radio"/> |
| Defiant – assertive, difficult or challenges the usual dominance order with other cats or people in your household. continues these actions despite unfavourable | <input type="radio"/> |
| Gentle – responds to others (people, cats or other animals) in an easy going manner, which is not rough or threatening.                                          | <input type="radio"/> |
| Constrained – controlled and not very impulsive.                                                                                                                 | <input type="radio"/> |
| Inquisitive – is drawn to new situation, objects, or animals and behaves as if s/he wishes to learn more about others or objects within view.                    | <input type="radio"/> |
| Inventive – is more likely than other cats to do new things                                                                                                      | <input type="radio"/> |

|                                                                                                                                                                                                                                        | Strongly<br>Disagree  | Disagree              | Somewhat<br>Disagree  | Neutral               | Somewhat<br>Agree     | Agree                 | Strongly<br>Agree     |
|----------------------------------------------------------------------------------------------------------------------------------------------------------------------------------------------------------------------------------------|-----------------------|-----------------------|-----------------------|-----------------------|-----------------------|-----------------------|-----------------------|
| including novel or problem solving behaviours (e.g. opening a cupboard or entering bags or boxes)                                                                                                                                      |                       |                       |                       |                       |                       |                       |                       |
| Irritable – often seems in a bad mood or is impatient and easily provoked to anger or other agnostic or threatening/aggressive behaviour.                                                                                              | <input type="radio"/> |
| Distractible – easily distracted and has a short attention span.                                                                                                                                                                       | <input type="radio"/> |
| Erratic – Inconsistent or widely varying in behaviour and moods.                                                                                                                                                                       | <input type="radio"/> |
| Solitary – spends times alone or avoids company by choice.                                                                                                                                                                             | <input type="radio"/> |
| Impulsive – displays spontaneous or sudden behaviour that was not anticipated.                                                                                                                                                         | <input type="radio"/> |
| Independent – behaviour not influenced or controlled by other animals, events or things.                                                                                                                                               | <input type="radio"/> |
| Jealous – often troubled by other cats, pets or people who are in a desirable or advantageous situation such as having food, a choice location, or access to social situation. May attempt to disrupt activities of advantageous cats. | <input type="radio"/> |
| Fearful of other cats – Retreats readily or                                                                                                                                                                                            | <input type="radio"/> |

|                                                                                                                                                                                                            | Strongly<br>Disagree  | Disagree              | Somewhat<br>Disagree  | Neutral               | Somewhat<br>Agree     | Agree                 | Strongly<br>Agree     |
|------------------------------------------------------------------------------------------------------------------------------------------------------------------------------------------------------------|-----------------------|-----------------------|-----------------------|-----------------------|-----------------------|-----------------------|-----------------------|
| moves away from other cats.                                                                                                                                                                                |                       |                       |                       |                       |                       |                       |                       |
| Persevering –<br>Continues in a course of action, task, or strategy for a long time or continues despite opposition.                                                                                       | <input type="radio"/> |
| Greedy – Excessively desirous or covetous of food, favoured locations, or other resources and unwilling to share these resources with other cats/pets.                                                     | <input type="radio"/> |
| Friendly to other cats –<br>Initiates proximity with or getting close to other cats; approached other cats readily and in a friendly manner, (e.g. with purrs, rubs).                                      | <input type="radio"/> |
| Submissive – Often gives in or yields to another cat/pet.                                                                                                                                                  | <input type="radio"/> |
| Dominant –<br>Controlling, exerting forcefulness, powerful with respect to other.                                                                                                                          | <input type="radio"/> |
| Predictable –<br>Consistent and steady behaviour over extended periods of time; sticks to a behavioural routine or set of activities; Does little that is unexpected or deviated from its usual behaviour. | <input type="radio"/> |
| Suspicious – Not trusting; does not approach easily, e.g. human or animal visitors in the house)                                                                                                           | <input type="radio"/> |
| Affectionate – Warm attachment to or                                                                                                                                                                       | <input type="radio"/> |

|                                                                                                                  | Strongly<br>Disagree  | Disagree              | Somewhat<br>Disagree  | Neutral               | Somewhat<br>Agree     | Agree                 | Strongly<br>Agree     |
|------------------------------------------------------------------------------------------------------------------|-----------------------|-----------------------|-----------------------|-----------------------|-----------------------|-----------------------|-----------------------|
| closeness with other cats, pets or people e.g. grooming, touching, or lying next to other cats, pets or people). |                       |                       |                       |                       |                       |                       |                       |
| Insecure – Seems scared easily, jumpy and fearful in general).                                                   | <input type="radio"/> |
| Bullying – Overbearing and intimidating towards other cats.                                                      | <input type="radio"/> |
| Curious – Seeks out or investigates novel situations.                                                            | <input type="radio"/> |
| Aimless – Seems to behave without any clear purpose or direction.                                                | <input type="radio"/> |
| Tense – Shows restraint in movement and posture, e.g. almost frozen in position.                                 | <input type="radio"/> |
| Fearful of people – Retreats readily or moves away from people, especially new people entering the house.        | <input type="radio"/> |
| Cool – Unaffected by emotions and usually undisturbed, assured, and calm.                                        | <input type="radio"/> |
| Aggressive to people – (Reacts in a hostile way or attempts to attack/threaten people).                          | <input type="radio"/> |
| Calm – (Not easily distributed by changes in the environment).                                                   | <input type="radio"/> |
| Excitable – Overreacts to changes in environment.                                                                | <input type="radio"/> |

|                                                                                                                                                                                                         | Strongly Disagree     | Disagree              | Somewhat Disagree     | Neutral               | Somewhat Agree        | Agree                 | Strongly Agree        |
|---------------------------------------------------------------------------------------------------------------------------------------------------------------------------------------------------------|-----------------------|-----------------------|-----------------------|-----------------------|-----------------------|-----------------------|-----------------------|
| Friendly to people – Initiates proximity or closeness to people by approaching readily and in a friendly manner, e.g. purring and/or rubbing against legs; approaches new people coming into the house. | <input type="radio"/> |
| Playful – Initiates and engages in non-aggressive play behaviour with objects, which may seem meaningless.                                                                                              | <input type="radio"/> |
| Vocal – Frequently and readily vocalizes.                                                                                                                                                               | <input type="radio"/> |
| Decisive – Seems determined and purposeful in his/her activities.                                                                                                                                       | <input type="radio"/> |
| Self-assured – Moves in seemingly confident, well-coordinated, and relaxed manner.                                                                                                                      | <input type="radio"/> |
| Anxious – Interested but fearful and uneasy; seems to change his/her mind about approach or withdrawal.                                                                                                 | <input type="radio"/> |
| Trusting – Not suspicious and approaches easily, e.g. human or animal visitors in the house.                                                                                                            | <input type="radio"/> |
| Active – Moves frequently, e.g. often walks, runs, stalks.                                                                                                                                              | <input type="radio"/> |
| Cooperative – Is compliant; willingly behaves when asked to do something.                                                                                                                               | <input type="radio"/> |
| Shy – Reluctant to approach other                                                                                                                                                                       | <input type="radio"/> |

|                      |          |                      |         |                   |       |                   |
|----------------------|----------|----------------------|---------|-------------------|-------|-------------------|
| Strongly<br>Disagree | Disagree | Somewhat<br>Disagree | Neutral | Somewhat<br>Agree | Agree | Strongly<br>Agree |
|----------------------|----------|----------------------|---------|-------------------|-------|-------------------|

animals or people,  
novel objects, or new

Powered by Qualtrics
